# Supplementary material
Source: PubMed Central journal article supplement (PMC3492956)

# Supplementary Figure 1

M. Sato-Hashimoto *et al.*

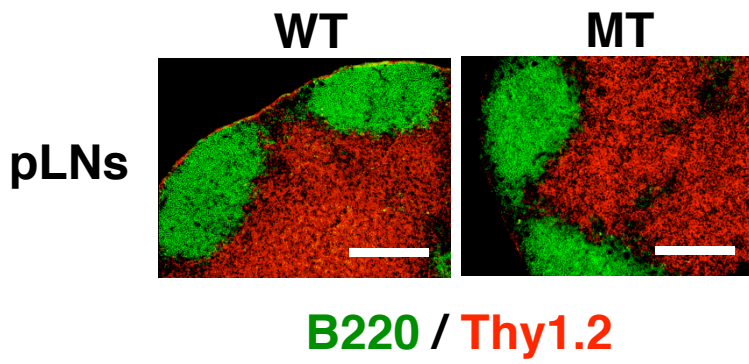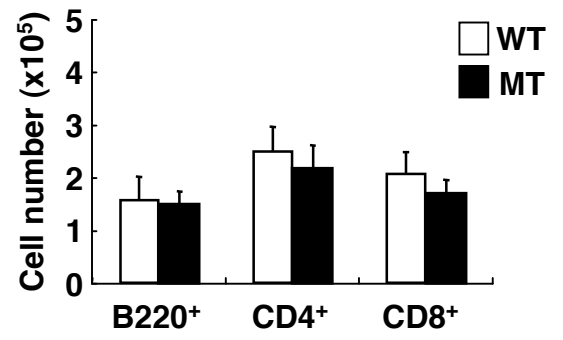

Supplement: NIHMS388394-supplement-Supplemental_Figure_1.pdf [file NIHMS388394-supplement-Supplemental_Figure_1.pdf]
